# Supplementary material for: Mechanism of MiR-145a-3p/Runx2 pathway in dexamethasone impairment of MC3T3-E1 osteogenic capacity in mice
Source: PubMed Central journal article supplement (PMC11575826; doi:10.1371/journal.pone.0309951), 2024-11-19

Figure 4

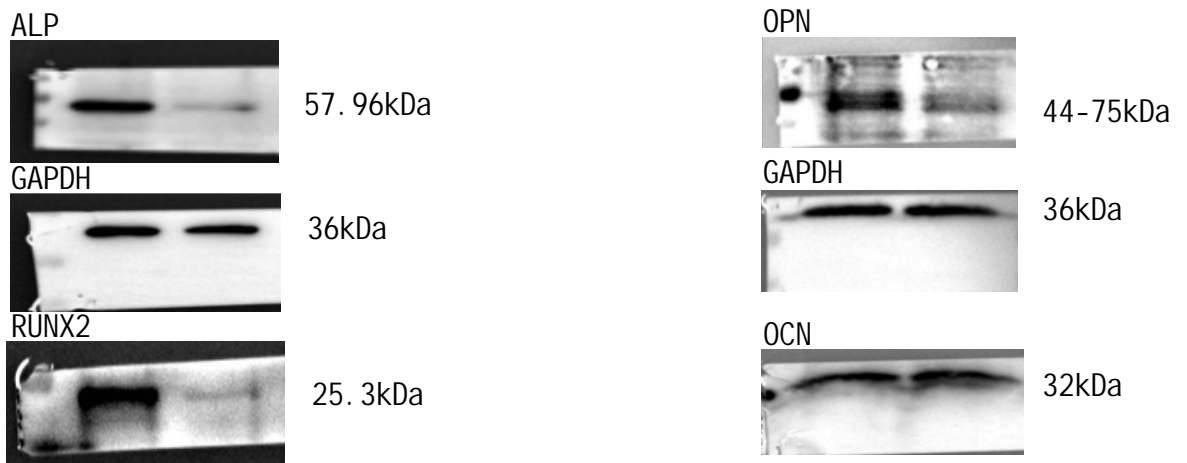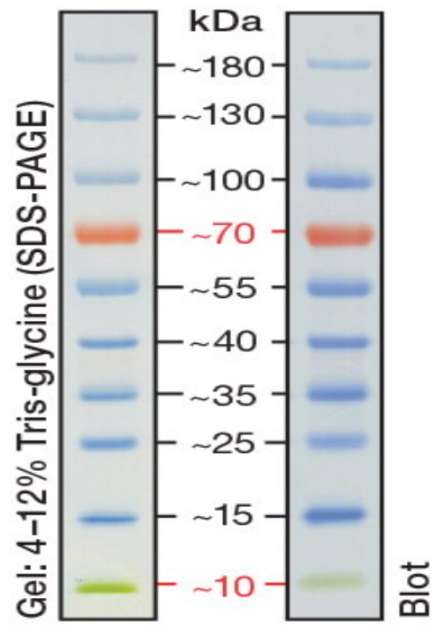

Figure 9

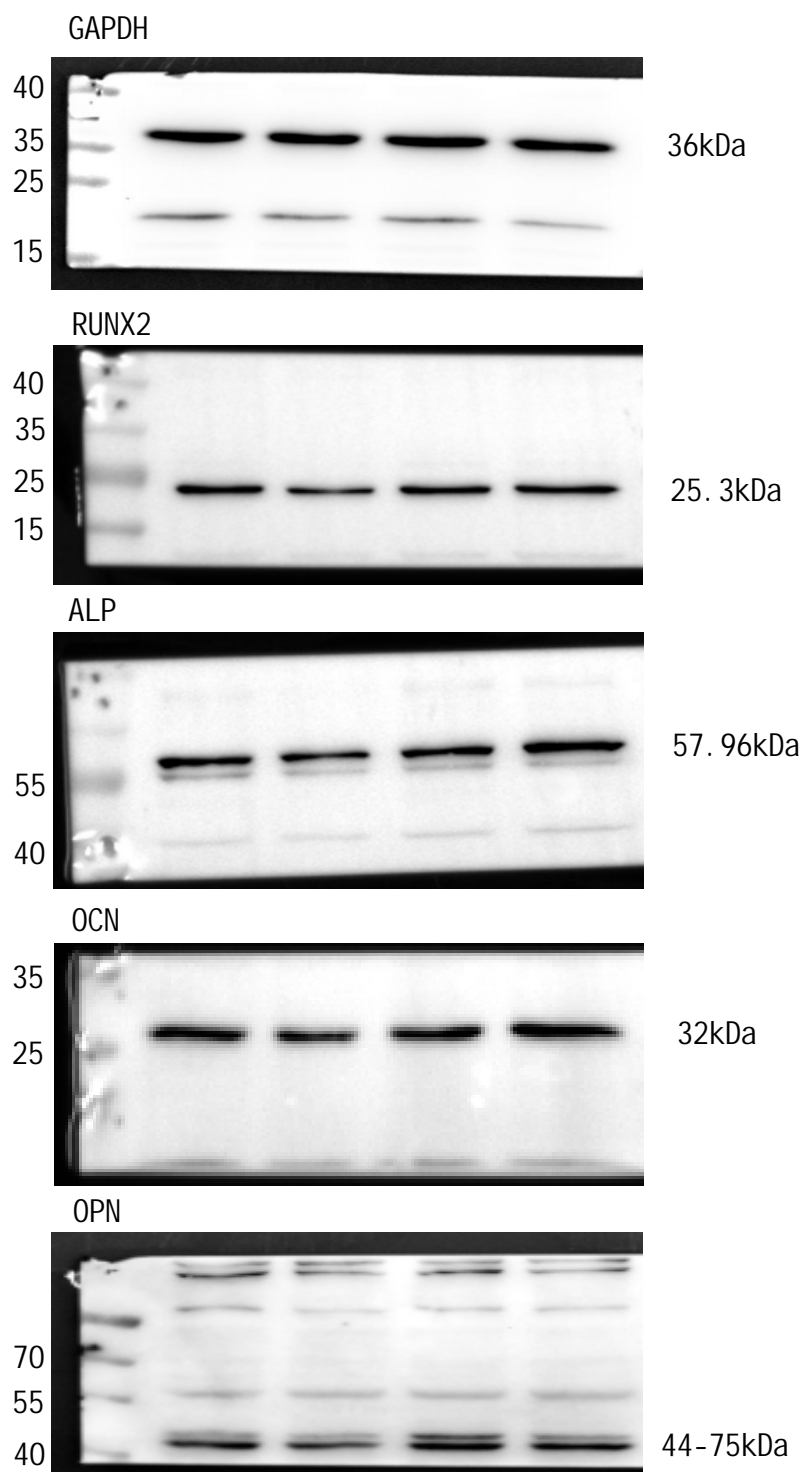

Supplement: pone.0309951.s001.pdf [file pone.0309951.s001.pdf]
